# Supplementary material
Source: PubMed Central journal article supplement (PMC2996427)
Supplement: 1009223107_pnas.201009223SI.pdf [file 1009223107_pnas.201009223SI.pdf]

# Supporting Information

Chen et al. 10.1073/pnas.1009223107

## SI Materials and Methods

**Fly Genetics.** Approximately 500 white-eyed flies were selected, and independent lines were established for the purpose of analyzing the *p38b* gene. Independent lines containing KG05418, KG05834, or EY11791 excisions were established (around 200 each) to characterize deficiencies in *p38a*, *p38c*, and *dMK2*, respectively. Genomic DNA was isolated from each line and the expected deletions were identified by PCR with specific primer pairs. The expected deficiency lines were validated by sequence analyses. The *p38a*<sup>13</sup> allele is a 1.4-kb deletion that uncovers the promoter region and 5' portion of the *p38a* transcript. The *p38b*<sup>156A</sup> allele contains a 900-bp deletion, including the promoter and 5' portion of *p38b*; *p38c*<sup>7</sup> contains a 2.1-kb deletion in which the entire *p38c* gene and 5' portion of CG31133 were deleted. The promoter region and 5' portion of the *dMK2* transcript, including the first two exons, are deleted in line *dMK2*<sup>5B</sup>. It was further confirmed with RT-PCR that *p38a*<sup>13</sup>, *p38b*<sup>156A</sup>, *p38c*<sup>7</sup>, and *dMK2*<sup>5B</sup> are null alleles of *p38a*, *p38b*, *p38c*, and *dMK2*, respectively (Fig S1 D and E). During the phenotype analysis of these mutants, mutant *p38a*<sup>1</sup> was reported (1). RT-PCR results indicate that *p38a*<sup>1</sup> is a *p38a* and *p38c* double mutant (Fig S1D).

The following fly stocks were used:

*y*<sup>1</sup> *w*<sup>67c23</sup> (Bloomington stock 6599)  
*y*<sup>1</sup> *w*<sup>\*</sup>; *ry*<sup>506</sup> *Sb*<sup>1</sup> *P*{*ry*[+*t7.2*]=*Delta2-3*}99B/TM6 (Bloomington stock 3664)  
*y*<sup>1</sup> *w*<sup>67c23</sup>; *ry*<sup>506</sup> *P*{*y*<sup>+mDint2</sup> *w*[*BR.E.BR*]=*SUPor-P*}<sup>KG05834</sup> (Bloomington stock 14126)  
*y*<sup>1</sup>; *ry*<sup>506</sup> *P*{*y*<sup>+mDint2</sup> *w*[*BR.E.BR*]=*SUPor-P*}*CG6I78*<sup>KG05318</sup> (Bloomington stock 13992)  
*y*<sup>1</sup> *w*<sup>67c23</sup>; *P*{*y*<sup>+mDint2</sup> *w*[*BR.E.BR*]=*SUPor-P*}*p38b*<sup>KG01337</sup>; *ry*<sup>506</sup> (Bloomington stock 14364)  
*y*<sup>1</sup> *w*<sup>67c23</sup> *P*{*w*[+*mC*] *y*[+*mDint2*]=*EPgy2*}<sup>EY11791</sup> (Bloomington stock 20697)  
*da-Gal4* (Bloomington stock 5460)  
*cn*<sup>1</sup> *bw*<sup>1</sup> *Hsf*<sup>4</sup> (Bloomington stock 5489)  
*cn*<sup>1</sup> *bw*<sup>1</sup> *Hsf*<sup>4</sup>; *P*{*w*[+*mC*]=*Hsf*[+*t8*]}1/TM3, *Sb*<sup>1</sup> *Ser*<sup>1</sup> (Bloomington stock 5490)  
*y*<sup>1</sup> *w*<sup>67c23</sup>; *P*{*y*[+*mDint2*] *w*[*BR.E.BR*]=*SUPor-P*}*Hsp27*<sup>KG03935</sup> *ry*<sup>506</sup> (Bloomington stock 13268)  
*y*<sup>1</sup> *w*<sup>67c23</sup>; *p38a*<sup>1</sup>  
*y*<sup>1</sup> *w*<sup>67c23</sup>; *p38a*<sup>13</sup>  
*y*<sup>1</sup> *w*<sup>67c23</sup>; *p38c*<sup>7</sup>  
*y*<sup>1</sup> *w*<sup>67c23</sup>; *p38b*<sup>156A</sup>  
*y*<sup>1</sup> *w*<sup>67c23</sup> *dMK2*<sup>5B</sup>  
*y*<sup>1</sup> *w*<sup>67c23</sup>; *p38b*<sup>156A</sup>; *p38a*<sup>1</sup>/SM5-TM6B  
*y*<sup>1</sup> *w*<sup>67c23</sup>; *p38b*<sup>156A</sup>; *p38a*<sup>13</sup>/SM5-TM6B  
*w* *UAS-p38b*[*w*+]  
*imd*<sup>1</sup>; *spz*<sup>RPF7</sup>  
*Tl*<sup>10b</sup> *mwh*<sup>1</sup>*e*<sup>1</sup>/TM3 *Ser*<sup>1</sup> *Sb*<sup>1</sup>; OR66  
*y*<sup>1</sup> *w*<sup>67c23</sup>; *UAS-hsp27.II*  
*Tl*<sup>632</sup> *ca*/TM6C

*drosom-lacZ*; *Tl*<sup>1-RXA</sup>/TM6C

*Tl*<sup>9QURE</sup> *e ca*/TM3 *Ser*

*dipt-lacZ*; *b pr imd*

**Complementary DNA Microarray Analysis.** Complementary DNA microarrays containing 15,000 known or predicted genes of the *Drosophila melanogaster* genome were processed. These arrays were used to identify genes that were differentially expressed in *p38b* compared with *y w* male adult flies. Each sample contained a pool of 40 males, 2 to 4 d old. The statistical significance (false-discovery rate, q-value) and the ratio of the changes in expression were calculated using Significance Analysis of Microarray software following LOWESS normalization. The expression fold changes were presented as ratios.

**Immune Response Assays.** An overnight culture of *Enterobacter cloacae* or *Listeria monocytogenes* was suspended in PBS and injected into 2- to 4-d-old adult flies using a Hamilton G33 needle. *Beauveria bassiana* (Mycotrol) was cultured in a petridish with potato agar for 6 d at 25 °C. Anesthetized adult flies were rolled on the petridish with fungal spores. Flies were allowed to recover at 29 °C, and live flies were counted every 12 h or daily. About 60 2- to 4-d-old adult flies were used for each assay. Three independent assays were made for each genotype. One-hundred microliters of PAO1 or PAOR3 suspending culture (O.D.<sup>600</sup> = 1.0) was introduced into each fly vial with sterilized food and overnight deposited eggs for natural infection of *Pseudomonas aeruginosa*.

**RT-PCR.** Total RNA was isolated from adult flies or S2 cells using TRIzol Reagent (Invitrogen; catalog #15596–018). CDNA was synthesized with oligo-dT primers and SuperScript II Reverse Transcriptase RT-PCR System (Invitrogen) and analyzed by PCR with gene-specific primers. Quantitative RT-PCR was then done on the Applied Biosystems ABI Prism 7700 or 7900 Sequence Detection System using the SYBR Green PCR master mix (ABI catalog #4309155). All assays were done in triplicate and normalized to *rp49* levels, and errors were propagated in all calculations. Primer sequences are available on request.

**RNA Interference.** Double-stranded RNA (dsRNA) was produced using a MEGAscript RNAi Kit (Ambion). S2 cells were incubated with serum-free medium containing 25 µg/mL dsRNA for 30 min. The RNAi-treated cells were grown in serum-containing medium for 72 h before immune response experiments. The *E. cloacae*-induced immune response was examined using S2 cells, as described previously (2). Cells were collected 30 min after induction and were subjected to Western blot analysis with anti-phospho-p38 antibodies (Santa Cruz Biotechnology).

**SDS/PAGE and Immunoblotting.** Live *Drosophila* larvae, adults, or S2 cells were ground directly into 100 µL of SDS/PAGE sample buffer on ice and then boiled for 5 min. Samples (10 µL) were resolved by SDS/PAGE on 4 to 20% gradient Novex Tris-Glycine gels (Invitrogen). Native PAGE was used to detect heat-shock factor (Hsf) trimerization, as described previously (3). Gels were blotted and blots were processed by standard methods using 5% skim milk in Tris-buffered saline (TBS) that consists of 20 mM TrisCl (pH 7.5) and 154 mM NaCl with 0.1% Tween-20 for blocking and incubation steps. Probed blots were rinsed in TBS plus 0.1% Tween, developed with the luminescent substrate Super Signal West Pico (Pierce), and then exposed to film. Pri-





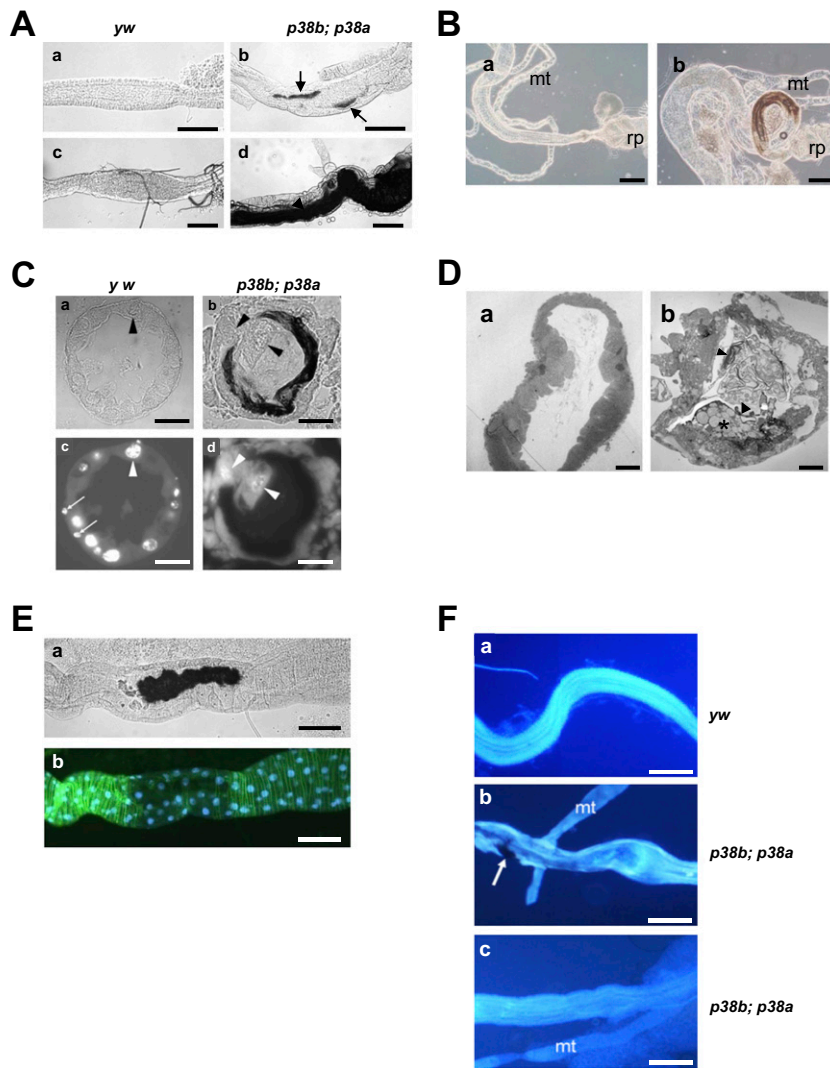

**Fig. 53.** (A) Hindgut defects of *p38b;p38a* double mutants. Nomarski images of hindguts that were dissected from late second instar larvae (a and b) and late third instar larvae (c and d) of wild-type control (a and c) and the *p38b;p38a* double mutant (b and d). The arrows in panel b point to two separated sites with melanization. Note the expansion of melanization in late-stage hindgut from *p38b;p38a* double mutant (d). (Scale bars, 100  $\mu\text{m}$ .) (B) Melanization was not observed in hindguts from 2-d-old *yw* adult (a) but in *p38b;p38a* double mutants (b). (Scale bars, 150  $\mu\text{m}$ .) (C) Micrographs of hindgut cross sections. Nomarski images of wild-type control (a) and *p38b;p38a* double mutants (b). Fluorescent images (c and d) with DAPI staining to show nuclei, show the same view as in a and b, respectively. Hindguts of third instar larvae were removed, and paraffin embedding and sectioning were performed. Arrowheads point to nuclei of epithelial cells. The arrows in c point to nuclei of muscle cells that line the outer surface of epithelial cells. (Scale bars, 20  $\mu\text{m}$ .) (D) Electron micrographs of hindgut cross sections from wild-type (a) and the *p38b;p38a* double mutants (b). The arrow and arrowhead point to the accumulated chitin masses and yeast cells in the lumen of the hindgut of *p38b;p38a*, respectively; the asterisk indicates the large vacuoles in the epithelial cells of the *p38b;p38a* hindgut. (Scale bars, 15  $\mu\text{m}$ .) (E) Hindgut of *p38b;p38a* mutant was dissected out and stained with DAPI (DNA, blue) and Alexa-phalloidin (muscle fibers, green). Nomarski (a) and fluorescence (b) images were taken under a Zeiss Axiovision microscope. (Scale bars, 80  $\mu\text{m}$ .) (F) Micrographs of hindgut stained with Calcofluor. Fluorescent images of hindguts from wild-type control (a) and *p38b;p38a* double mutants (b and c) were taken under the same condition. The midstage instar larvae were feed with 0.1% Calcofluor White Stain (Fluka) for 3 h and then hindguts were dissected. The arrow in b points to a melanotic mass in hindgut of *p38b;p38a* double mutant. Note the weakening of fluorescent intensity which represented thickness of chitin lining on the surface of gut lumen in *p38b;p38a* double mutant under standard culture condition (b) and sterile condition (c). (Scale bars, 150  $\mu\text{m}$ .)





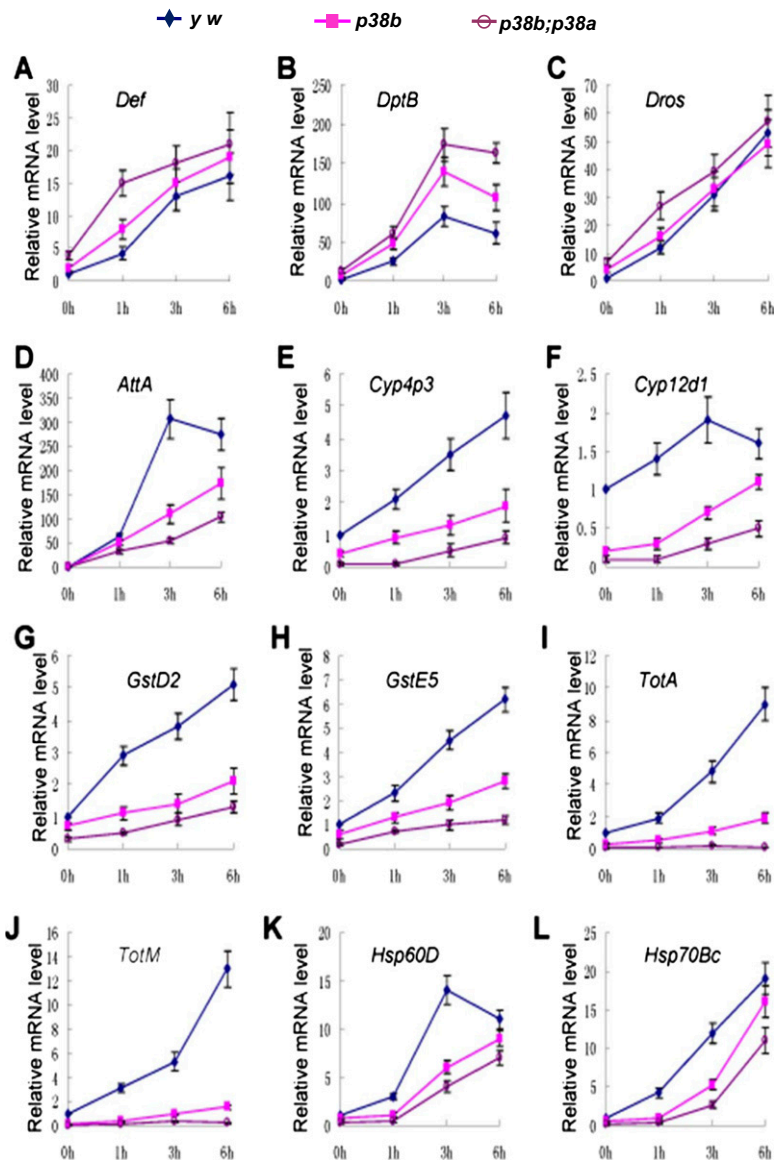

**Fig. S6.** The expression of selected p38 target genes characterized from microarray analysis before or after septic infection with a mixture of *E. cloacae* and *L. monocytogenes* was determined by quantitative RT-PCR normalized with internal control *rp49*. *Defensin* (A), *Diptericin B* (B), and *Drosomycin* (C) are up-regulated, and *Attacin A* (D), *Cyp4p3* (E), *Cyp12d1* (F), *GstD2* (G), *GstE5* (H), *TotA* (I), *TotM* (J), *Hsp60D* (K), and *hsp70Bc* (L) are down-regulated in *p38b* and *p38b;p38a* mutant flies. Data from three independent experiments are expressed as mean  $\pm$  SEM.

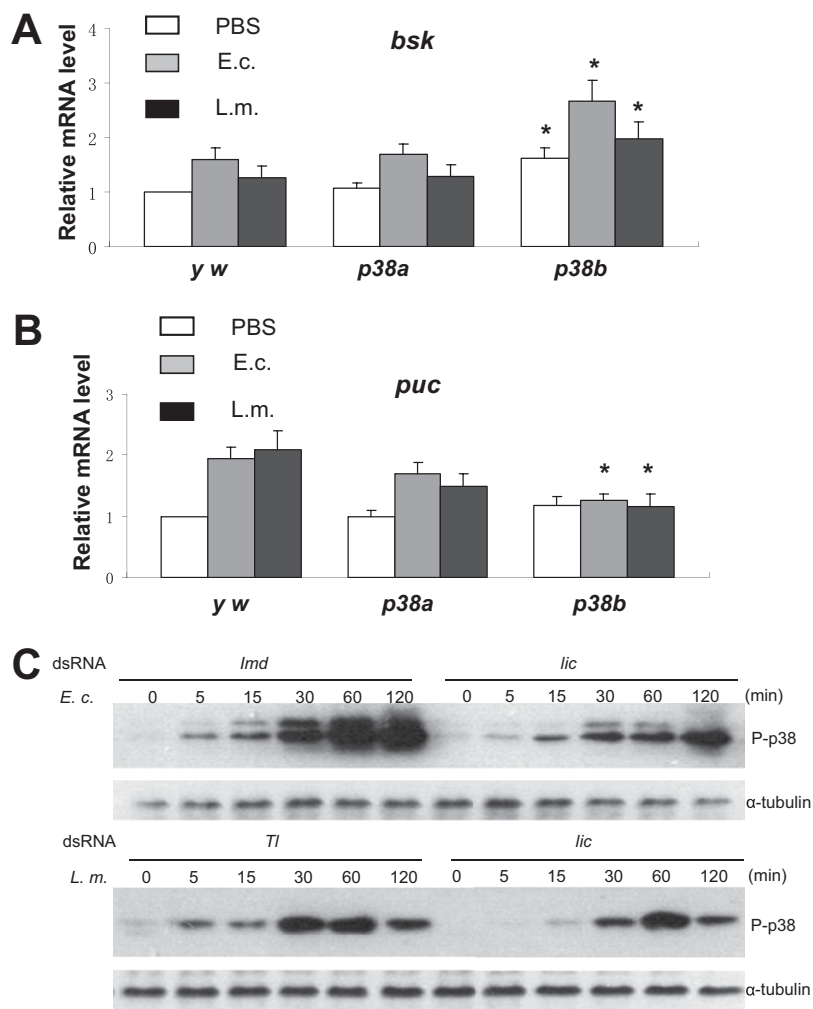

**Fig. 57.** (A) Relative mRNA levels of *bsk* in wild-type, *p38a*, and *p38b* mutants are shown with quantitative RT-PCR, normalized with the internal control *rp49*. Data are mean ( $\pm$  SEM) fold changes in *bsk* mRNA levels. \**p38b* vs. *y.w*,  $P < 0.02$ . (B) Relative mRNA levels of *puc* in wild-type, *p38a*, and *p38b* mutants are shown with quantitative RT-PCR, normalized with the internal control *rp49*. Data are mean ( $\pm$  SEM) fold changes in *puc* mRNA levels. \**p38b* vs. *y.w*,  $P < 0.01$ . (C) Phosphorylation of p38 was measured in S2 cells with RNAi knockdown of *lmd*, *Tl*, and *lic* at different time points after treatment with Gram-negative *E. cloacae* or Gram-positive *L. monocytogenes*. Phosphorylation was assayed by Western blotting using phospho-specific antibodies of p38.  $\alpha$ -Tubulin is shown as a loading control.

## Other Supporting Information Files

[Dataset S1 \(XLS\)](#)

[Dataset S2 \(XLS\)](#)
